# Supplementary material
Source: publisher figshare collection journal article supplement (https://acs.figshare.com/ndownloader/files/13665596)
Supplement: Supplementary file 1 [file 13665596]

# Supporting Information

## **Confined Single Alkali Metal Ion Platform in Zeolite Pore for Concerted Benzene C–H Activation-to-Phenol Catalysis**

Shankha S. Acharyya<sup>a</sup>, Shilpi Ghosh<sup>a</sup>, Takuma Kaneko<sup>a</sup>, Kotaro Higashi<sup>a</sup>, Yusuke Yoshida<sup>a</sup>, Takehiko Sasaki<sup>b</sup>  
and Yasuhiro Iwasawa<sup>\*a,c</sup>

<sup>a</sup> Innovation Research Center for Fuel Cells, The University of Electro-Communications, Chofu, Tokyo 182-8585, Japan

<sup>b</sup> Graduate School of Frontier Science, The University of Tokyo, Kashiwa, Chiba 277-8561, Japan

<sup>a</sup> Graduate School of Informatics and Engineering, The University of Electro-Communications, Chofu, Tokyo 182-8585, Japan

\*Corresponding author's e-mail: [iwasawa@pc.uec.ac.jp](mailto:iwasawa@pc.uec.ac.jp)

**Table S1:** Performances of catalysts for the gas-phase hydroxylation of benzene to phenol in the literature

| Catalyst                                              | Oxidant                         | Reaction Condition                                       | Benz Conv (%) | Phenol Select (%) | Reference                                           |
|-------------------------------------------------------|---------------------------------|----------------------------------------------------------|---------------|-------------------|-----------------------------------------------------|
| Fe/ ZSM5 catalysts                                    | N <sub>2</sub> O                | Temperature= 350°C-400°C                                 | 20-30         | 99                | <i>Appl. Catal. A: Gen</i> , <b>1992</b> , 82,31    |
| Cu/ZSM-5 catalyst                                     | O <sub>2</sub>                  | Temperature= 400 °C                                      | 2.0           | 60                | <i>J. Mol. Catal. A</i> <b>2002</b> , 178, 89.      |
| FeAlPO-5                                              | N <sub>2</sub> O                | Temperature= 380°C                                       | 13.4          | 97                | <i>Chem. Commun.</i> <b>2006</b> , 4955             |
| Interstitial-N/Re Cluster/Zeolite                     | O <sub>2</sub> +NH <sub>3</sub> | Temperature= 280°C                                       | 0.8           | 88                | <i>Angew. Chem.</i> <b>2006</b> , 45, 448           |
| VxOy@C-0.195–120                                      | O <sub>2</sub>                  | Temperature= 80 °C<br>Pressure(O <sub>2</sub> )= 3.0 MPa | 13.0          | 93.8              | <i>Green Chem.</i> <b>2013</b> ,15, 1150-1154       |
| 10% Pd-VOx Nanoparticles                              | O <sub>2</sub>                  | Temperature= 140 °C<br>Pressure= 2.0 MPa                 | 4.5           | 99                | <i>ChemPlusChem</i> <b>2014</b> , 79, 680           |
| Pt-Re/ZSM-5                                           | O <sub>2</sub> +NH <sub>3</sub> | Temperature= 260°C                                       | 13            | 78                | <i>ChemCatChem</i> <b>2013</b> , 5, 2203            |
| Ir/β                                                  | O <sub>2</sub> +NH <sub>3</sub> | Temperature= 300°C                                       | 12            | 70                | <i>ChemCatChem</i> <b>2015</b> , 7, 3248            |
| Cu(II)/CuCr <sub>2</sub> O <sub>4</sub> Nanoparticles | Air                             | Temperature= 350 °C<br>Pressure (air)= 3.5 MPa           | 36            | 78                | <i>ACS Catal.</i> <b>2015</b> , 5, 2850             |
| Fe/ZSM-5 nanosheet                                    | N <sub>2</sub> O                | Temperature=350°C                                        | 27.9          | 99                | <i>ACS Catal.</i> <b>2017</b> , 7, 2709             |
| Meso-Fe-ZSM-5                                         | N <sub>2</sub> O                | Temperature=320°C<br>Pressure= 101 kPa.                  | 22.1          | 100               | <i>Catal. Sci. Technol.</i> , <b>2011</b> , 1, 1250 |
| Cs/β zeolite                                          | O <sub>2</sub> +NH <sub>3</sub> | Temperature=320°C                                        | 5.9           | 83.4              | This Work                                           |
| Rb/β zeolite                                          | N <sub>2</sub> O                | Temperature=300°C                                        | 25.5          | 99.9              | This Work                                           |

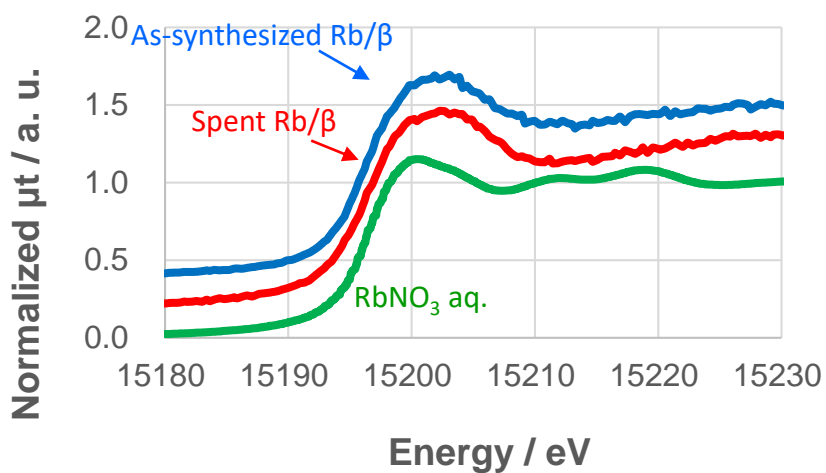

**Figure S1.** *In situ* Rb K-edge XANES spectra. Blue: fresh (as-synthesized) Rb/ $\beta$  catalyst. Red: spent Rb/ $\beta$  catalyst. Green: RbNO<sub>3</sub> reference. RbNO<sub>3</sub> aq. from A. Mihelič, A. Kodre, I. Arčon, J. P. Gomilšek, *Acta Chim. Slov.* 51, 33 (2004).

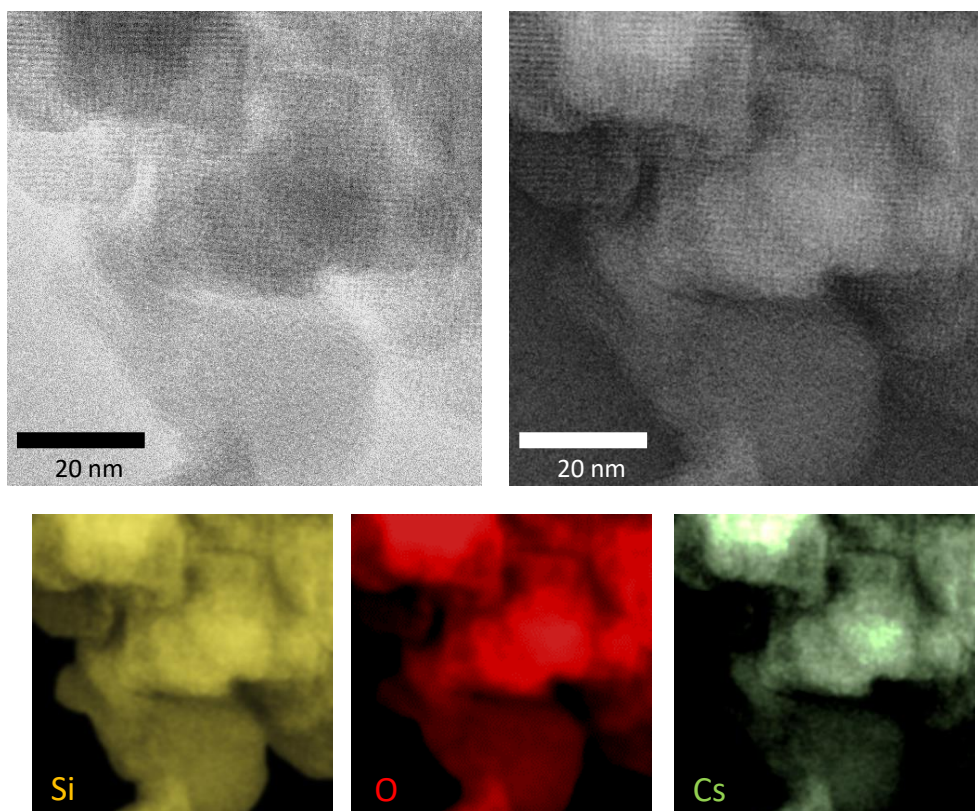

**Figure S2.** Bright and dark fields STEM images and elements (Si, O and Cs) mapping for Cs(2 wt%)/ $\beta$ . The bright and dark fields STEM images reveal no images except for the  $\beta$  zeolite lattice.

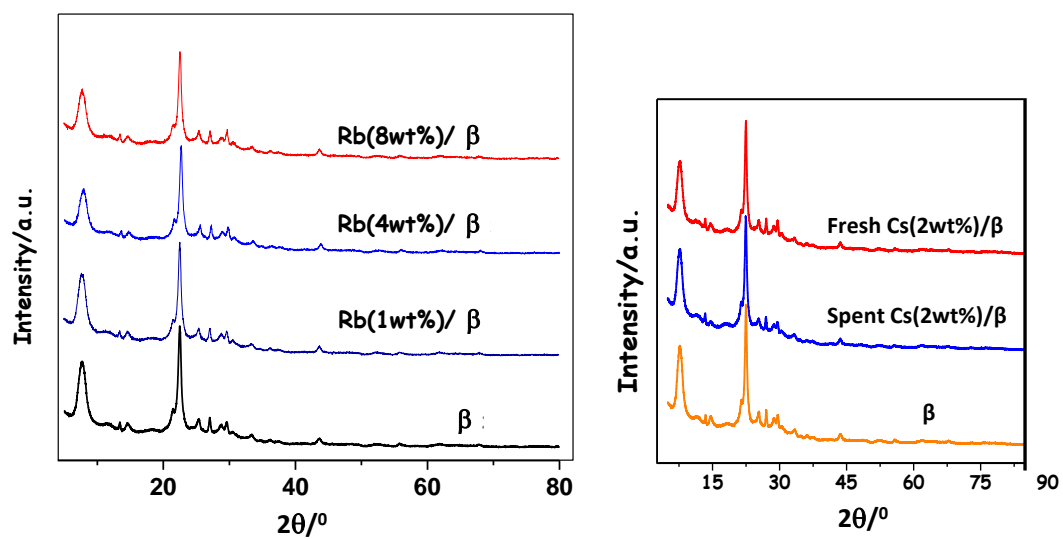

**Figure S3.** XRD patterns for Rb/β and Cs/β catalysts. They are similar to XRD pattern of β. There are neither Rb oxides nor Cs oxides.

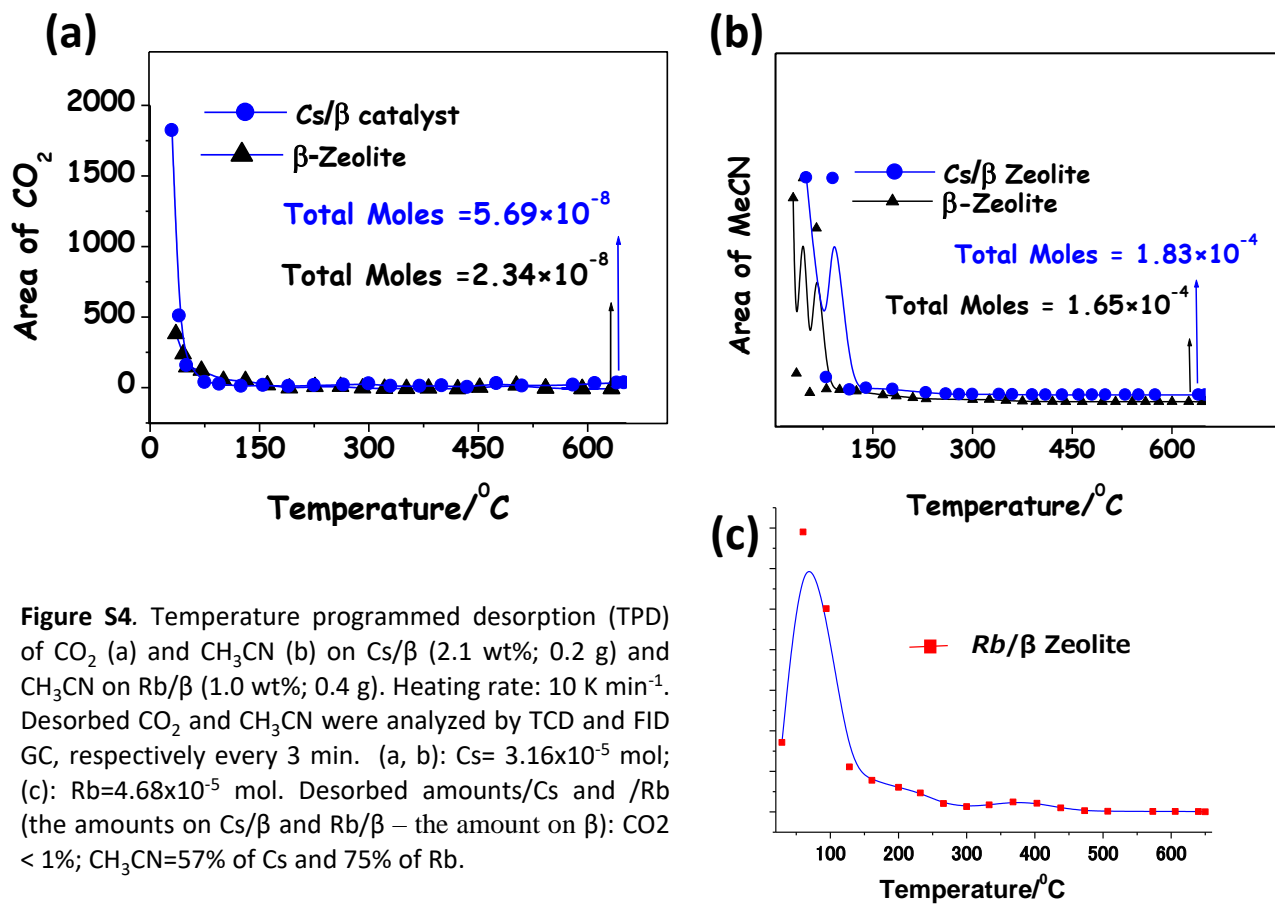

**Figure S4.** Temperature programmed desorption (TPD) of CO<sub>2</sub> (a) and CH<sub>3</sub>CN (b) on Cs/β (2.1 wt%; 0.2 g) and CH<sub>3</sub>CN on Rb/β (1.0 wt%; 0.4 g). Heating rate: 10 K min<sup>-1</sup>. Desorbed CO<sub>2</sub> and CH<sub>3</sub>CN were analyzed by TCD and FID GC, respectively every 3 min. (a, b): Cs =  $3.16 \times 10^{-5}$  mol; (c): Rb =  $4.68 \times 10^{-5}$  mol. Desorbed amounts/Cs and /Rb (the amounts on Cs/β and Rb/β – the amount on β): CO<sub>2</sub> < 1%; CH<sub>3</sub>CN = 57% of Cs and 75% of Rb.

*Associative Bz + N<sub>2</sub>O coadsorption, downhill energy pathway for forming the Bz-O bond and proton migration for phenol synthesis on single Cs<sup>+</sup> site*

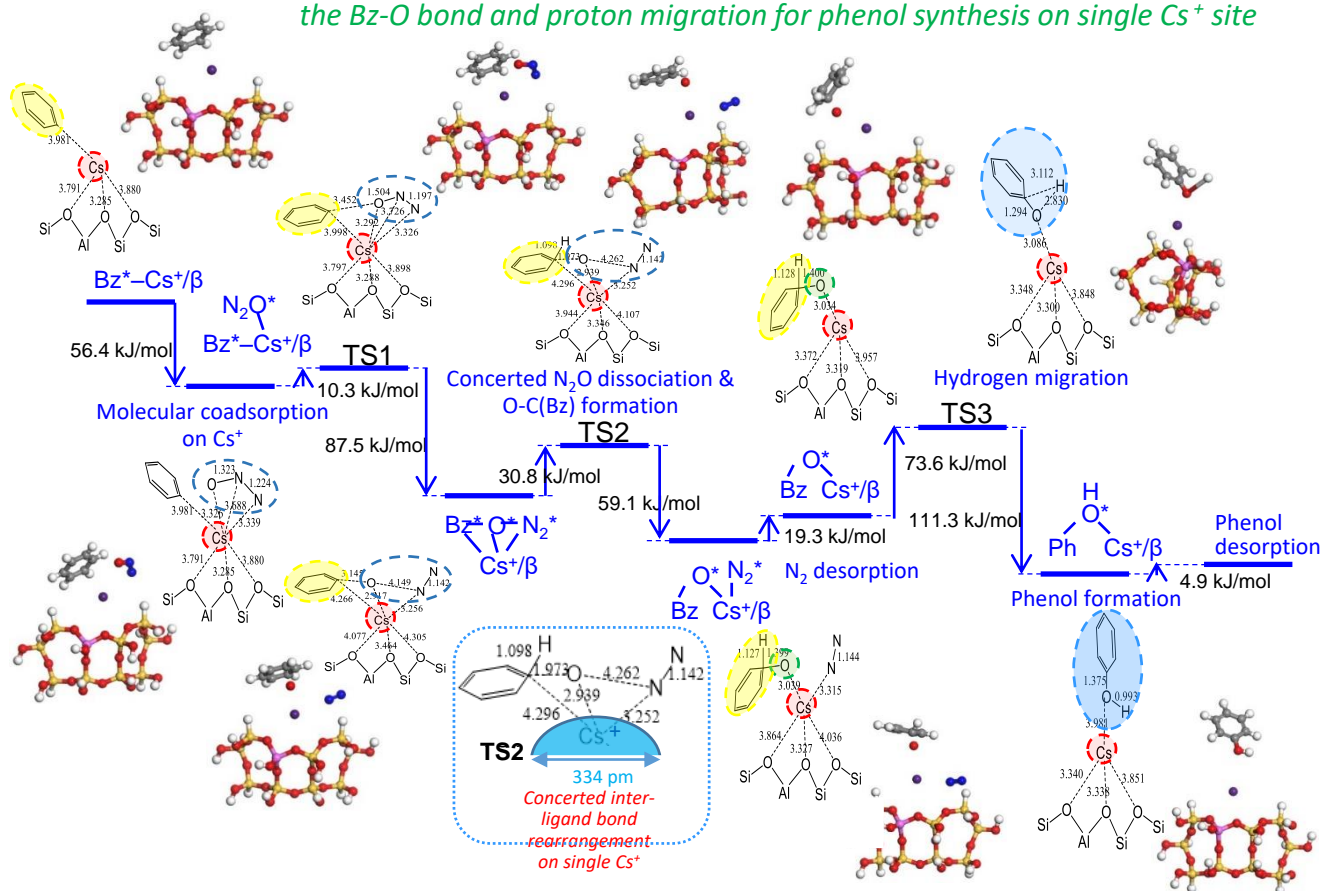

**Figure S5.** A computational downhill-energy reaction profile for the concerted inter-ligand reaction mechanism involving coadsorption and transition states for the selective oxidation of benzene to phenol with N<sub>2</sub>O on the Cs<sup>+</sup>/β cluster by DFT calculations. Asterisks(\*) imply direct interaction with Cs<sup>+</sup>.

*Associative Bz + N<sub>2</sub>O coadsorption, downhill energy pathway for forming the Bz-O bond and proton migration for phenol synthesis on single Na<sup>+</sup> site*

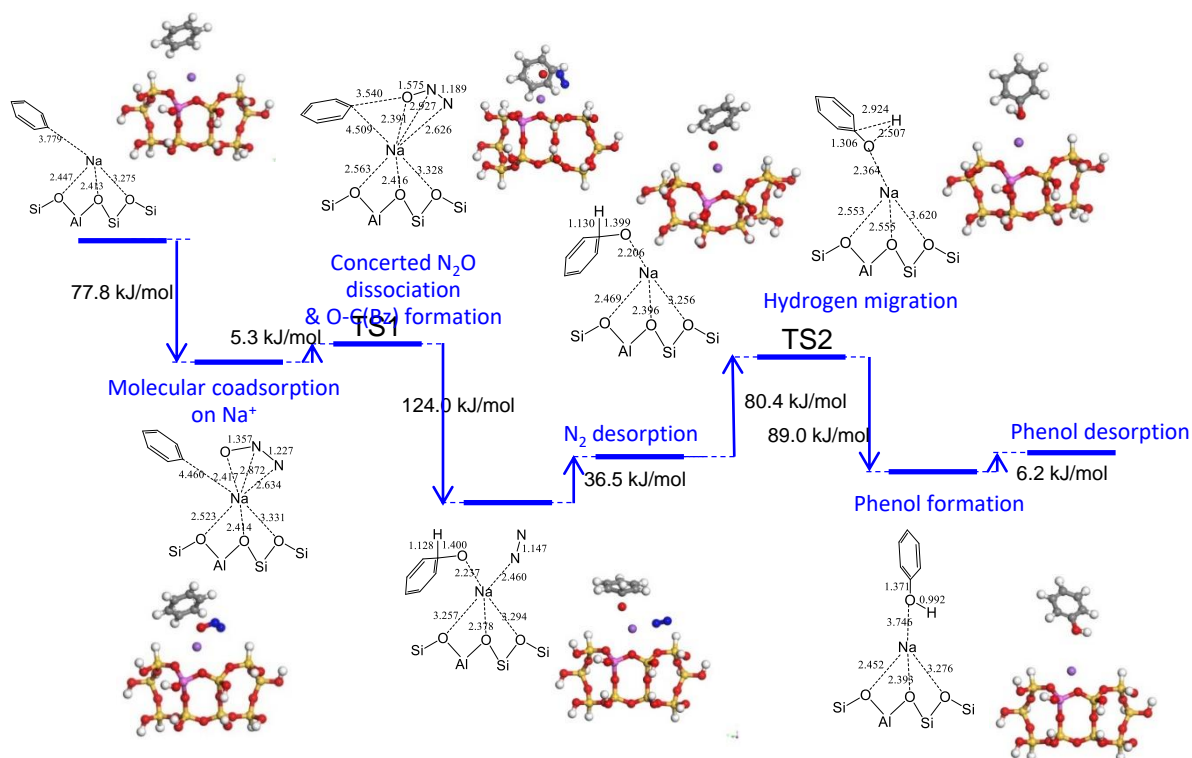

**Figure S6.** A computational downhill-energy reaction profile for the concerted inter-ligand reaction mechanism involving coadsorption and transition states for the selective oxidation of benzene to phenol with N<sub>2</sub>O on the Na<sup>+</sup>/β cluster by DFT calculations. Asterisks(\*) imply direct interaction with Na<sup>+</sup>.



*Associative Bz + O<sub>2</sub> + NH<sub>3</sub> coadsorption and double-cascade reaction pathway for forming the Bz-O bond on single Cs<sup>+</sup> site*

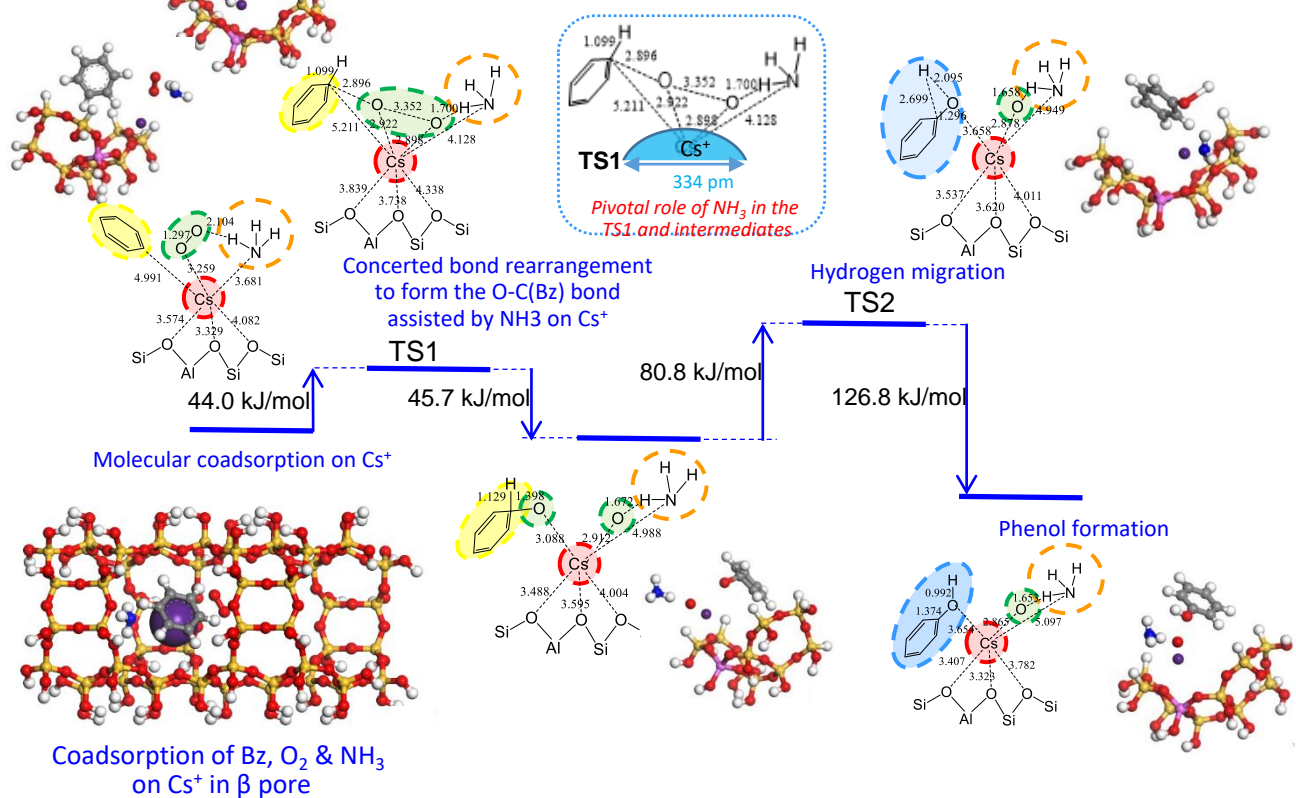

**Figure S7.** A computational reaction profile for the concerted inter-ligand reaction mechanism involving coadsorption states and transition states for the selective oxidation of benzene to phenol with O<sub>2</sub> regulated by NH<sub>3</sub> on the Cs<sup>+</sup>/ $\beta$  cluster by DFT calculations. Cs: dark purple, O: red, C: gray, H: white, N: blue, Si: yellow, Al: pink.

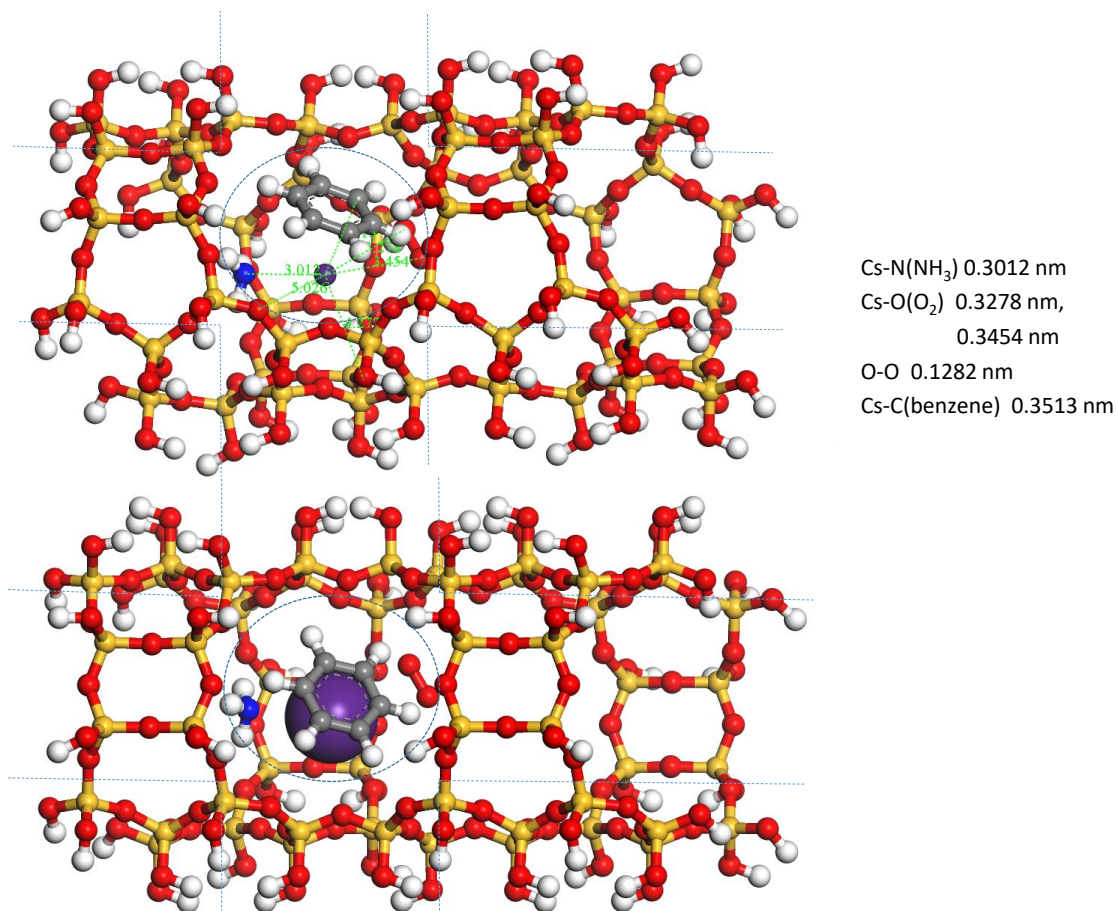

**Figure S8.** Computational coadsorption arrangement on a Cs<sup>+</sup> ion incorporated in  $\beta$  pore for benzene, O<sub>2</sub> and NH<sub>3</sub> by DFT calculations. Cs<sup>+</sup> ion has a large ion diameter of 0.334 nm, which provides a reaction platform.

**Table S2.** Performances (conversion and selectivity) of various transition and precious metal ions/ $\beta$  zeolite catalysts for the selective oxidation of benzene to phenol with  $O_2+NH_3$  at 593 K <sup>[†]</sup>

| Catalyst            | Benzene conv./% | Phenol selec./% | TOF/h <sup>-1</sup> | $NH_3$ ] <sub>reacted</sub> / |
|---------------------|-----------------|-----------------|---------------------|-------------------------------|
|                     |                 |                 |                     | [Phenol] <sub>produced</sub>  |
| V (2 wt%)/ $\beta$  | 1.0             | 6.85            | 0.125               | 1450                          |
| Cr (2 wt%)/ $\beta$ | 1.64            | 3.4             | 0.204               | 1050                          |
| Mn (2 wt%)/ $\beta$ | 2.1             | 0.5             | 0.260               | 12400                         |
| Fe (2 wt%)/ $\beta$ | 0.83            | 10.6            | 0.0704              | 124                           |
| Co (2 wt%)/ $\beta$ | 0.1             | 35.8            | 0.0122              | 1610                          |
| Ni (2 wt%)/ $\beta$ | 4.9             | 1.83            | 0.414               | 1420                          |
| Cu (2 wt%)/ $\beta$ | 0.4             | 4.33            | 0.052               | 3410                          |
| Ir (2 wt%)/ $\beta$ | 1.01            | 30.3            | 0.125               | 428                           |
| Ag (2 wt%)/ $\beta$ | 0.14            | 54.7            | 0.018               | 992                           |

<sup>[†]</sup> The catalysts were pretreated with benzene/ $O_2$ / $NH_3$ /He=0.5/0.5/1.8/4 mL min<sup>-1</sup> at 673 K for 0.5 h. Cat. = 0.6 g; Performance values: averaged during 30-180 min time-on-stream. Benzene/ $O_2$ / $NH_3$ /He = 0.5/0.5/1.8/4.0 mL min<sup>-1</sup>.

$[NH_3]_{\text{reacted}}/[Phenol]_{\text{produced}}$ : reacted  $NH_3$  amount/produced phenol amount. TOF is defined as reacted benzene(mol)/total metal(mol)/h. Zeolite  $\beta$  was purchased from JGC C&C.
